# Supplementary material
Source: publisher figshare collection journal article supplement (https://karger.figshare.com/articles/dataset/_/12058101)

**a**

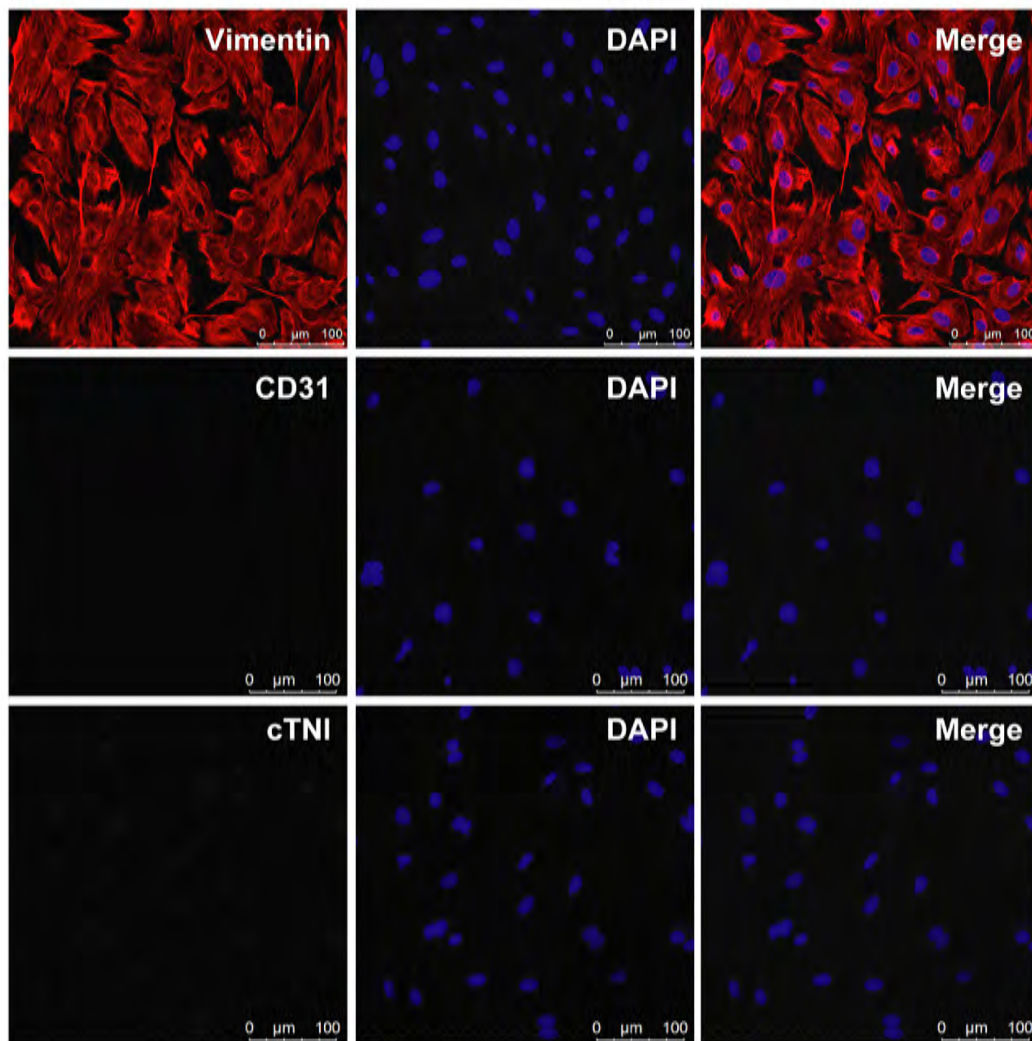

**b**

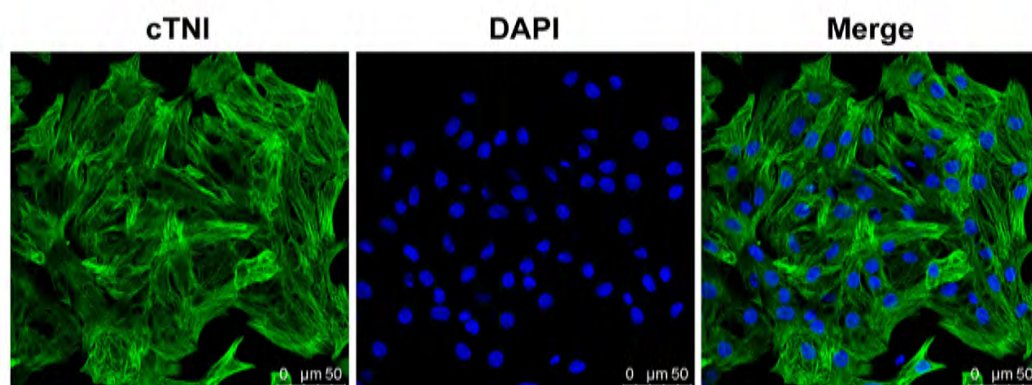

Supplement: Supplementary file 1 [file 1]
